# Supplementary material for: DELLA-Mediated Gibberellin Acid Participation in the Regulation of Dormancy and Growth of Fraxinus mandshurica Rupr.
Source: MDPI journal article supplement (doi:10.3390/f14112128), 2023-10-25
Supplement: s1 [file s1]

Table S1 the primer nucleotide sequence of genes for RT-qPCR

|          |                           |
|----------|---------------------------|
| TU-F     | AGGACGCTGCCAACAACTTT      |
| TU-R     | TTGAGGGGAAGGGTAAATAGTG    |
| RGA1-F   | ACAAGTCAACAGCACCCACCG     |
| RGA1-R   | ATTGACTCATTAGGCGAACCCC    |
| GAI-F    | TAGCAGACGCATTGGTGAAGC     |
| GAI-R    | CATTTGAAGAACATCGGAATAGGAG |
| XERICO-F | GAGTGCTCGGTCTGCTTGTCTG    |
| XERICO-R | CGAGGCACGACTTGTGGAAAA     |
| GID1-F   | ATGACGGATGGGCTGCTCTTA     |
| GID1-R   | CTGCTCGAACTGCTACATGGTGA   |
| GA2ox-F  | TGGGTGGCTTTCTCTCAGGTGA    |
| GA2ox-R  | CTCCGTGCCCTTTGTTTCTCGT    |
| DOG1-F   | CTGGCTGAGGAGTTGGCAAGTT    |
| DOG1-R   | CCTTATTCCGCCACCGTTCCT     |
| DOG2-F   | CTTCCACTGATGCCGACACTGA    |
| DOG2-R   | TTGAGCAAGCCTACGCAGAGTC    |
| PP2C-F   | AGCGGATGGCAGAGGATGAGTG    |
| PP2C-R   | AGACGCATCGGAGCAGGACTT     |
